# Supplementary material
Source: MDPI journal article supplement (https://www.mdpi.com/search?q=ijerph-15-02643)
Supplement: s001 [file ijerph-15-02643-s001.pdf]

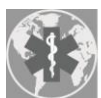

Supplementary Material

## Assessment of Risk, Vulnerability and Adaptation to Climate Change by the Health Sector in Madagascar

Norohasina Rakotoarison <sup>1</sup>, Nirivololona Rahoiljao <sup>2,\*</sup>, Lalao Madeleine Razafindramavo <sup>1</sup>, Zo Andrianina Patrick Herintiana Rakotomavo <sup>2</sup>, Alain Rakotoarisoa <sup>3</sup>, Joy Shumake Guillemot <sup>4</sup>, Zazaravaka Jacques Randriamialisoa <sup>5</sup>, Victor Mafilaza <sup>1</sup>, Voahanginirina Anne Marie Pierrette Ramiandrisoa <sup>2</sup>, Rhino Rajaonarivony <sup>2</sup>, Solonomenjanahary Andrianjafinirina <sup>2</sup>, Venance Tata<sup>1</sup>, Manuela Christophère Vololoniaina <sup>6</sup>, Fanjasoa Rakotomanana <sup>7</sup> and Volahanta Malala Raminosoa <sup>8</sup>

**Table S1.** Correlation between diarrhea and climate and socioeconomical parameters.

| DISTRICT      | DIARRHEA          | TMI     | TMAX    | Rainfall | Rainy day | Water  | ALPHABETIZATION | Poverty  |
|---------------|-------------------|---------|---------|----------|-----------|--------|-----------------|----------|
| ANTANANARIVO  | Pearson Corr      | 0.339** | 0.423** | 0.184*   | -0.090    | 0.063  | -0.455**        | -0.318** |
|               | Sig. (bilatérale) | 0.000   | 0.000   | 0.014    | 0.243     | 0.403  | 0.000           | 0.000    |
| DIEGO SUAREZI | Pearson Corr      | 0.146   | 0.195** | -0.009   | 0.074     | 0.367* | -0.539**        | -0.560** |
|               | Sig. (bilatérale) | 0.051   | 0.009   | 0.905    | 0.321     | 0.000  | 0.000           | 0.000    |
| FARAFANGANA   | Pearson Corr      | 0.134   | -0.033  | -0.002   | 0.051     | 0.368* | 0.643**         | 0.600**  |
|               | Sig. (bilatérale) | 0.073   | 0.657   | 0.981    | 0.515     | 0.000  | 0.000           | 0.000    |
| MOROMBE       | Pearson Corr      | 0.151*  | 0.122   | 0.187*   | 0.217**   | 0.049  | 0.374**         | -0.516** |
|               | Sig. (bilatérale) | 0.043   | 0.101   | 0.012    | 0.007     | 0.515  | 0.000           | 0.000    |
| MORONDAVA     | Pearson Corr      | 0.271** | 0.088   | 0.324**  | 0.418**   | 0.161* | 0.347**         | -0.513** |
|               | Sig. (bilatérale) | 0.000   | 0.238   | 0.000    | 0.000     | 0.031  | 0.000           | 0.000    |
| NOSY BE       | Pearson Corr      | 0.126   | -0.092  | -0.051   | -0.098    | 0.091  | -0.703**        | -0.741** |
|               | Sig. (bilatérale) | 0.093   | 0.221   | 0.494    | 0.189     | 0.223  | 0.000           | 0.000    |

**Table S2.** Correlation between malnutrition and climate and socioeconomical parameters.

| DISTRICT      | MALNUTRITION      | TMIN   | TMAX   | Rainfall | Rainy day | Water    | ALPHABETIZATION | Poverty |
|---------------|-------------------|--------|--------|----------|-----------|----------|-----------------|---------|
| ANTANANARIVO  | Pearson Corr      | 0.122  | 0.183* | 0.067    | 0.166*    | -0.354** | 0.015           | 0.166*  |
|               | Sig. (bilatérale) | 0.104  | 0.014  | 0.375    | 0.030     | 0.000    | 0.837           | 0.026   |
| ANTSIRANANA I | Pearson Corr      | 0.183* | 0.117  | 0.187*   | 0.198**   | -0.296** | 0.112           | 0.063   |
|               | Sig. (bilatérale) | 0.014  | 0.116  | 0.012    | 0.008     | 0.000    | 0.136           | 0.398   |
| FARAFANGANA   | Pearson Corr      | 0.011  | 0.126  | 0.223**  | 0.134     | 0.218**  | -0.268**        | 0.068   |
|               | Sig. (bilatérale) | 0.884  | 0.093  | 0.003    | 0.084     | 0.003    | 0.000           | 0.364   |

|           |                   |         |        |         |         |        |         |         |
|-----------|-------------------|---------|--------|---------|---------|--------|---------|---------|
| MOROMBE   | Pearson Corr      | 0.158*  | 0.168* | 0.021   | 0.139   | 0.091  | 0.133   | 0.364** |
|           | Sig. (bilatérale) | 0.034   | 0.024  | 0.782   | 0.085   | 0.226  | 0.075   | 0.000   |
| MORONDAVA | Pearson Corr      | 0.236** | 0.183* | 0.223** | 0.215** | -0.042 | 0.083   | -0.028  |
|           | Sig. (bilatérale) | 0.001   | 0.014  | 0.003   | 0.004   | 0.579  | 0.267   | 0.711   |
| NOSY BE   | Pearson Corr      | 0.028   | -0.033 | 0.110   | 0.077   | 0.005  | 0.242** | 0.235** |
|           | Sig. (bilatérale) | 0.707   | 0.663  | 0.141   | 0.305   | 0.948  | 0.001   | 0.002   |

**Table S3.** Correlation between malaria and climate and socioeconomical parameters.

| DISTRICT       | MALARIA<br>(1 month) | TMIN   | TMAX   | Rainfall | Rainy<br>day | Water   | ALPHABETIZATION | Poverty |
|----------------|----------------------|--------|--------|----------|--------------|---------|-----------------|---------|
| ANTANANARIVO   | Pearson<br>Corr      | 0.137  | -0.006 | 0.160*   | 0.145        | 0.082   | 0.383**         | 0.116   |
|                | Sig.<br>(bilatérale) | 0.067  | 0.939  | 0.033    | 0.059        | 0.273   | 0.000           | 0.123   |
| DIEGO SUAREZ I | Pearson<br>Corr      | 0.100  | 0.008  | 0.227**  | 0.206**      | -0.019  | 0.538**         | 0.680** |
|                | Sig.<br>(bilatérale) | 0.184  | 0.918  | 0.002    | 0.006        | 0.804   | 0.000           | 0.000   |
| FARAFANGANA    | Pearson<br>Corr      | 0.176* | -0.033 | 0.063    | 0.151        | 0.288** | 0.046           | 0.310** |
|                | Sig.<br>(bilatérale) | 0.018  | 0.657  | 0.400    | 0.053        | 0.000   | 0.542           | 0.000   |
| MOROMBE        | Pearson<br>Corr      | 0.070  | 0.082  | 0.109    | 0.104        | 0.131   | 0.356**         | 0.488** |
|                | Sig.<br>(bilatérale) | 0.354  | 0.277  | 0.148    | 0.200        | 0.080   | 0.000           | 0.000   |
| MORONDAVA      | Pearson<br>Corr      | 0.115  | 0.153* | 0.193**  | 0.007        | 0.159*  | 0.252**         | 0.586** |
|                | Sig.<br>(bilatérale) | 0.127  | 0.041  | 0.010    | 0.931        | 0.033   | 0.001           | 0.000   |
| NOSY BE        | Pearson<br>Corr      | 0.054  | 0.088  | 0.207**  | 0.211**      | -0.021  | 0.425**         | 0.490** |
|                | Sig.<br>(bilatérale) | 0.475  | 0.241  | 0.005    | 0.005        | 0.778   | 0.000           | 0.000   |

**Table S4.** Correlation between ARI and climate and socioeconomical parameters.

| DISTRICT       | ARI                  | TMIN   | TMAX    | Rainfall | Rainy<br>day | Water   | ALPHABETIZATION | Poverty  |
|----------------|----------------------|--------|---------|----------|--------------|---------|-----------------|----------|
| ANTANANARIVO   | Pearson<br>Corr      | -0.028 | 0.096   | -0.033   | -0.215**     | 0.055   | -0.652**        | -0.161*  |
|                | Sig.<br>(bilatérale) | 0.708  | 0.201   | 0.658    | 0.005        | 0.464   | 0.000           | 0.031    |
| DIEGO SUAREZ I | Pearson<br>Corr      | 0.183* | 0.218** | -0.036   | -0.025       | -0.077  | -0.673**        | -0.627** |
|                | Sig.<br>(bilatérale) | 0.014  | 0.003   | 0.628    | 0.743        | 0.306   | 0.000           | 0.000    |
| FARAFANGANA    | Pearson<br>Corr      | 0.119  | 0.040   | -0.212** | -0.130       | 0.422** | 0.741**         | 0.492**  |
|                | Sig.<br>(bilatérale) | 0.112  | 0.593   | 0.004    | 0.094        | 0.000   | 0.000           | 0.000    |
| MOROMBE        | Pearson<br>Corr      | 0.022  | -0.006  | 0.060    | 0.089        | 0.154*  | 0.288**         | -0.606** |
|                | Sig.<br>(bilatérale) | 0.765  | 0.938   | 0.426    | 0.269        | 0.040   | 0.000           | 0.000    |
| MORONDAVA      | Pearson<br>Corr      | 0.174* | 0.034   | 0.150*   | 0.373**      | -0.035  | 0.127           | -0.674** |

|         |                      |       |       |        |        |       |          |          |
|---------|----------------------|-------|-------|--------|--------|-------|----------|----------|
|         | Sig.<br>(bilatérale) | 0.020 | 0.650 | 0.046  | 0.000  | 0.641 | 0.089    | 0.000    |
| NOSY BE | Pearson<br>Corr      | 0.118 | 0.054 | -0.008 | -0.086 | 0.014 | -0.697** | -0.687** |
|         | Sig.<br>(bilatérale) | 0.036 | 0.711 | 0.047  | 0.081  | 0.012 | 0.000    | 0.000    |

**Table S5.** Matrix of the exposure assessment.

| Exposure           | Cyclone                                            | Flood                                     | Drought                               |
|--------------------|----------------------------------------------------|-------------------------------------------|---------------------------------------|
|                    | Frequency from 2006 to 2014 (9 years, 24 cyclones) | Frequency from 1975 to 2014 (26 episodes) | Frequency of 1981 - 2014 (9 episodes) |
| <b>Very strong</b> | Frequency > 8                                      | Frequency > 13                            | Frequency > 8                         |
| <b>Strong</b>      | Frequency from 5 to 8                              | Frequency from 5 to 13                    | Frequency from 5 to 8                 |
| <b>Average</b>     | Frequency from 3 to 5                              | Frequency from 1 to 5                     | Frequency from 1 to 5                 |
| <b>Low</b>         | Frequency of cyclone < 3                           | Frequency = 0                             | Fréquency = 0                         |

**Table S6.** Matrix of sensitivity assessment.

| Sensitivity        | Economic characteristics                                                       | Accessibility to health center(HC)                                                                                                                                      | Characteristics of the habitat                                                                                           | Demographic, health and communication conditions                                                                                                                                                                                                                                                     |
|--------------------|--------------------------------------------------------------------------------|-------------------------------------------------------------------------------------------------------------------------------------------------------------------------|--------------------------------------------------------------------------------------------------------------------------|------------------------------------------------------------------------------------------------------------------------------------------------------------------------------------------------------------------------------------------------------------------------------------------------------|
| <b>Very strong</b> | Poverty rate > 80% or Percentage of active men working in agriculture > 80%    | Accessibility rate in WASH infrastructure < 20% Or percentage of households making a journey of more than one hour to reach, from the town center, the nearest HC > 80% | Percentage of habitats with non-solid wall > 80%                                                                         | Density of the population > 100 inhabitants / km <sup>2</sup><br>Prevalence ARI in children under 5 > 20%<br>Immunization rate of children aged 12 - 23 months < 40%<br>Percentage of children aged 12 to 23 months with acute malnutrition > 10%                                                    |
| <b>Strong</b>      | Poverty rate of 75 to 80% or Living percentage of natural resources 75% to 80% | Accessibility rate in WASH infrastructure from 20 to 40% Or households making a journey more than one hour to reach, from the town center, the                          | Percentage of dwellings in non-solid materials 60 to 80% Hazardous area (coastal, flood, arid, altitude > 800m - plague) | Density of the population from 50 to 100 inhabitants / km <sup>2</sup><br>Prevalence ARI in children under 5 years of age from 15 to 20%<br>Immunization rate of children from 12 to 23 months from 40 to 60%<br>Percentage of children aged 12 to 23 months with acute malnutrition from 8.6% to 7% |

| Sensitivity    | Economic characteristics                                                            | Accessibility to health center(HC)                                                                                                                                                   | Characteristics of the habitat                                                                                               | Demographic, health and communication conditions                                                                                                                                                                                                                        |
|----------------|-------------------------------------------------------------------------------------|--------------------------------------------------------------------------------------------------------------------------------------------------------------------------------------|------------------------------------------------------------------------------------------------------------------------------|-------------------------------------------------------------------------------------------------------------------------------------------------------------------------------------------------------------------------------------------------------------------------|
|                |                                                                                     | nearest HC 60 to 80%                                                                                                                                                                 |                                                                                                                              |                                                                                                                                                                                                                                                                         |
| <b>Average</b> | Poverty rate of 65 to 75% or Percentage living of natural resources from 65% to 75% | Accessibility rate in WASH infrastructure from 40 to 60% Or percentage of population living more than 10km from 40 to 60% HC                                                         | Percentage of dwellings in non-solid materials from 40 to 60% Hazardous area (coastal, flood, arid, altitude> 800m - plague) | Density of the population from 25 to 50hab / km2<br>Prevalence IRA in children under 5 years of age from 10 to 15%<br>Immunization rate of children from 12 to 23 months from 60 to 80%<br>Percentage of children aged 12 to 23 months with acute malnutrition 5% to 7% |
| <b>Low</b>     | Poverty rate of <65% or Living percentage of natural resources <65%                 | Percentage of households who hygienically remove stool from their children> 60% Or households making a journey more than one hour to reach, from the town center, the nearest HC<40% | Percentage of dwellings in non-solid materials <40% Hazardous area (coastal, flood, arid, altitude <800m - plague)           | Density of the population of <25 inhabitants / km2<br>Prevalence IRA in children <5 years <10%<br>Immunization rate of children from 12 - 23 months> 80%<br>Percentage of children aged 12 to 23 months with acute malnutrition <5%                                     |

**Table S7.** Matrix of adaptive capacity assessment.

| Adaptability      | Health system                                                                                                      | Community                                                                                                   | Household                                                                                                                                                                               |
|-------------------|--------------------------------------------------------------------------------------------------------------------|-------------------------------------------------------------------------------------------------------------|-----------------------------------------------------------------------------------------------------------------------------------------------------------------------------------------|
| <b>Verystrong</b> | Physician ratio per 10,000 population> 1<br>Ratio of inhabitants per health facility <10,000                       | Lightweight car accessibility coverage rate permanently 100%                                                | Literacy rate of individuals over 15 years> 80%<br>Non-farm business ownership rate> 50%<br>Average annual salary income> 2,000,000 Ar                                                  |
| <b>Strong</b>     | Physician ratio per 10,000 inhabitants: 0.5 to 1<br>Ratio of inhabitants per health facility from 10,000 to 15,000 | Coverage rate of communes in communication (mobile phone, Madagascar National Radio Channel(MNR,) light car | Literacy rate of individuals over 15 years of age from 70% to 80%<br>Non-farm business ownership rate from 30% to 50%<br>Average annual salary income from Ar 1,500,000 to Ar 2,000,000 |

| Adaptability                                  | Health system                                                                                                        | Community                                                                                                        | Household                                                                                                                                                                               |
|-----------------------------------------------|----------------------------------------------------------------------------------------------------------------------|------------------------------------------------------------------------------------------------------------------|-----------------------------------------------------------------------------------------------------------------------------------------------------------------------------------------|
| accessibility permanently)<br>from 75 to 100% |                                                                                                                      |                                                                                                                  |                                                                                                                                                                                         |
| <b>Average</b>                                | Physician ratio per 10,000 inhabitants: 0.3 to 0.5<br>Ratio of inhabitants per health facility from 15,000 to 20,000 | Municipal coverage rate in communication (mobile phone, MNR, light car accessibility permanently) from 50 to 75% | Literacy rate of individuals over 15 years of age from 50% to 70%<br>Non-farm business ownership rate from 25% to 30%<br>Average annual salary income from 1,200,000 Ar to 1,500,000 Ar |
| <b>Low</b>                                    | Physician ratio per 10,000 population <0.3<br>Population ratio per health facility > 20,000                          | Communal coverage rate in communication (mobile phone, MNR, light car accessibility permanently) <50%            | Literacy rate of individuals over 15 <50%<br>Non-farm business ownership rate <25%<br>Average annual salary income <1,200,000 Ar (SMIG)                                                 |

**Table S8.** Matrix of the regions’ vulnerability assessment.

| REGION                   | EXPOSURE<br>To hazards | SENSITIVITY<br>to the health risks of<br>hazards | ADAPTIVE<br>CAPACITY* | VULNERABILITY |
|--------------------------|------------------------|--------------------------------------------------|-----------------------|---------------|
| <b>East Coast</b>        |                        |                                                  |                       |               |
| Sava                     | Yellow                 | Yellow                                           | Yellow                | Yellow        |
| Analanjirofo             | Yellow                 | Yellow                                           | Red                   | Red           |
| Atsinanana               | Red                    | Yellow                                           | Green                 | Yellow        |
| VatovavyFitovinany       | Yellow                 | Yellow                                           | Yellow                | Yellow        |
| AtsimoAtsinanana         | Red                    | Red                                              | Red                   | Red           |
| <b>North West</b>        |                        |                                                  |                       |               |
| Diana                    | Yellow                 | Yellow                                           | Yellow                | Yellow        |
| Sofia                    | Yellow                 | Yellow                                           | Yellow                | Yellow        |
| Betsiboka                | Green                  | Yellow                                           | Green                 | Green         |
| Boeny                    | Yellow                 | Yellow                                           | Yellow                | Yellow        |
| <b>Côte Ouest</b>        |                        |                                                  |                       |               |
| Melaky                   | Yellow                 | Red                                              | Yellow                | Yellow        |
| Menabe                   | Yellow                 | Yellow                                           | Yellow                | Yellow        |
| <b>Central highlands</b> |                        |                                                  |                       |               |
| Analamanga               | Red                    | Green                                            | Green                 | Yellow        |
| AlaotraMangoro           | Yellow                 | Green                                            | Green                 | Green         |
| Itasy                    | Green                  | Yellow                                           | Green                 | Green         |

|                 |  |  |  |  |
|-----------------|--|--|--|--|
| Bongolava       |  |  |  |  |
| Vakinankaratra  |  |  |  |  |
| Ihorombe        |  |  |  |  |
| Amoron'i Mania  |  |  |  |  |
| Haute Matsiatra |  |  |  |  |
| South           |  |  |  |  |
| Atsimoandrefana |  |  |  |  |
| Androy          |  |  |  |  |
| Anosy           |  |  |  |  |

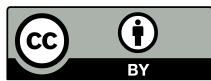

© 2018 by the authors. Submitted for possible open access publication under the terms and conditions of the Creative Commons Attribution (CC BY) license (<http://creativecommons.org/licenses/by/4.0/>).
